# Supplementary material for: Iron accumulation in tumor-associated macrophages marks an improved overall survival in patients with lung adenocarcinoma
Source: PubMed Central journal article supplement (PMC6683135; doi:10.1038/s41598-019-47833-x), 2019-08-05
Supplement: 41598_2019_47833_MOESM1_ESM.pdf [file 41598_2019_47833_MOESM1_ESM.pdf]

## **Iron accumulation in tumor-associated macrophages marks an improved overall survival in patients with lung adenocarcinoma**

Thielmann, Carl Maximilian <sup>1,2,6</sup>, Costa da Silva, Milene <sup>1,2,3,4,6</sup>, Muley, Thomas <sup>5,6</sup>, Meister, Michael <sup>5,6</sup>, Herpel, Esther <sup>7,8</sup>, Muckenthaler, Martina U.\* <sup>1,2,6</sup>

<sup>1</sup> Department of Pediatric Oncology, Hematology and Immunology, University of Heidelberg, Heidelberg, Germany

<sup>2</sup> Molecular Medicine Partnership Unit (MMPU), University of Heidelberg & EMBL, Heidelberg, Germany

<sup>3</sup> Graduate Program in Areas of Basic and Applied Biology (GABBA), University of Porto, Porto, Portugal

<sup>4</sup> German Cancer Research Center (DKFZ), University of Heidelberg, Heidelberg, Germany

<sup>5</sup> Translational Research Unit, Thoraxklinik, at University Hospital Heidelberg, Heidelberg, Germany

<sup>6</sup> Translational Lung Research Center (TLRC), German Center for Lung Research (DZL), Heidelberg, Germany

<sup>7</sup> Institute of Pathology, University of Heidelberg, Heidelberg, Germany

<sup>8</sup> Tissue Bank of the National Center for Tumor Diseases (NCT), Heidelberg, Germany

## Supplementary Data

**Supplementary Table 1** Overall survival rates (median) for cohorts in Figure 4

| Investigated Cohort           | OS (median)  | Corresponding Figure |
|-------------------------------|--------------|----------------------|
| NSCLC (ADC + SCC)             | 71.9 months  | Figure 4A            |
| Adenocarcinoma (ADC)          | 71.5 months  | Figure 4B            |
| Squamous cell carcinoma (SCC) | 103.3 months | Figure 4B            |
| ADC (Fe <sup>+</sup> )        | 75.8 months  | Figure 4C, left      |
| ADC (Fe <sup>-</sup> )        | 31.45 months | Figure 4C, left      |
| SCC (Fe <sup>+</sup> )        | 61.8 months  | Figure 4D, left      |
| SCC (Fe <sup>-</sup> )        | 119.2 months | Figure 4D, left      |
| ADC (CD68 <sup>High</sup> )   | 31.35 months | Figure 4C, right     |
| ADC (CD68 <sup>Low</sup> )    | 118.8 months | Figure 4C, right     |
| SCC (CD68 <sup>High</sup> )   | 139.1 months | Figure 4D, right     |
| SCC (CD68 <sup>Low</sup> )    | 107.0 months | Figure 4D, right     |

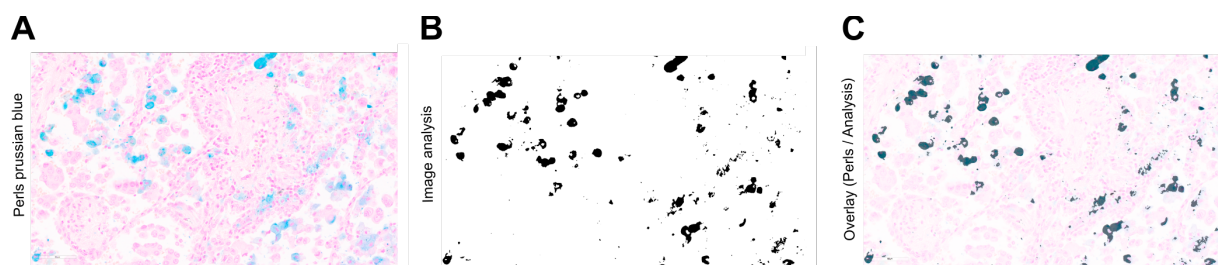

**Supplemental Figure 1: Ilastik computer based separation of staining.** (A) Example for the Perls' prussian blue staining before image analysis. (B) Example for simple segmentation separation of staining and background. (C) Overlay (opacity 50%) showing the accuracy of the segmentation.

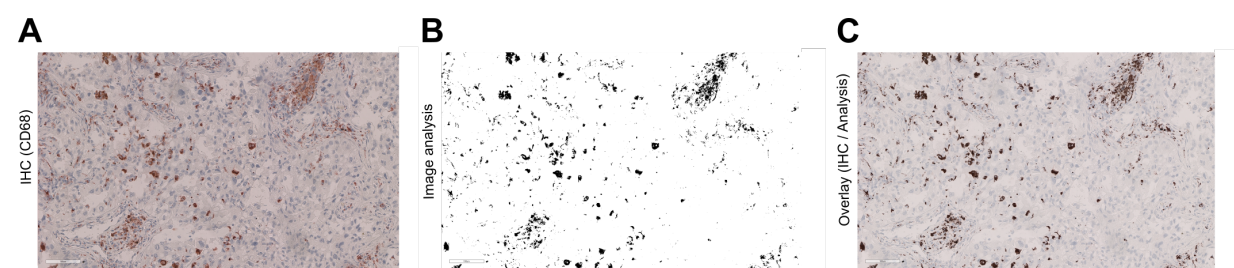

**Supplemental Figure 2: Ilastik computer based separation of staining.** (A) Example for the CD68 Immunohistochemistry staining before image analysis. (B) Example for simple segmentation separation of staining and background. (C) Overlay (opacity 50%) showing the accuracy of the segmentation.

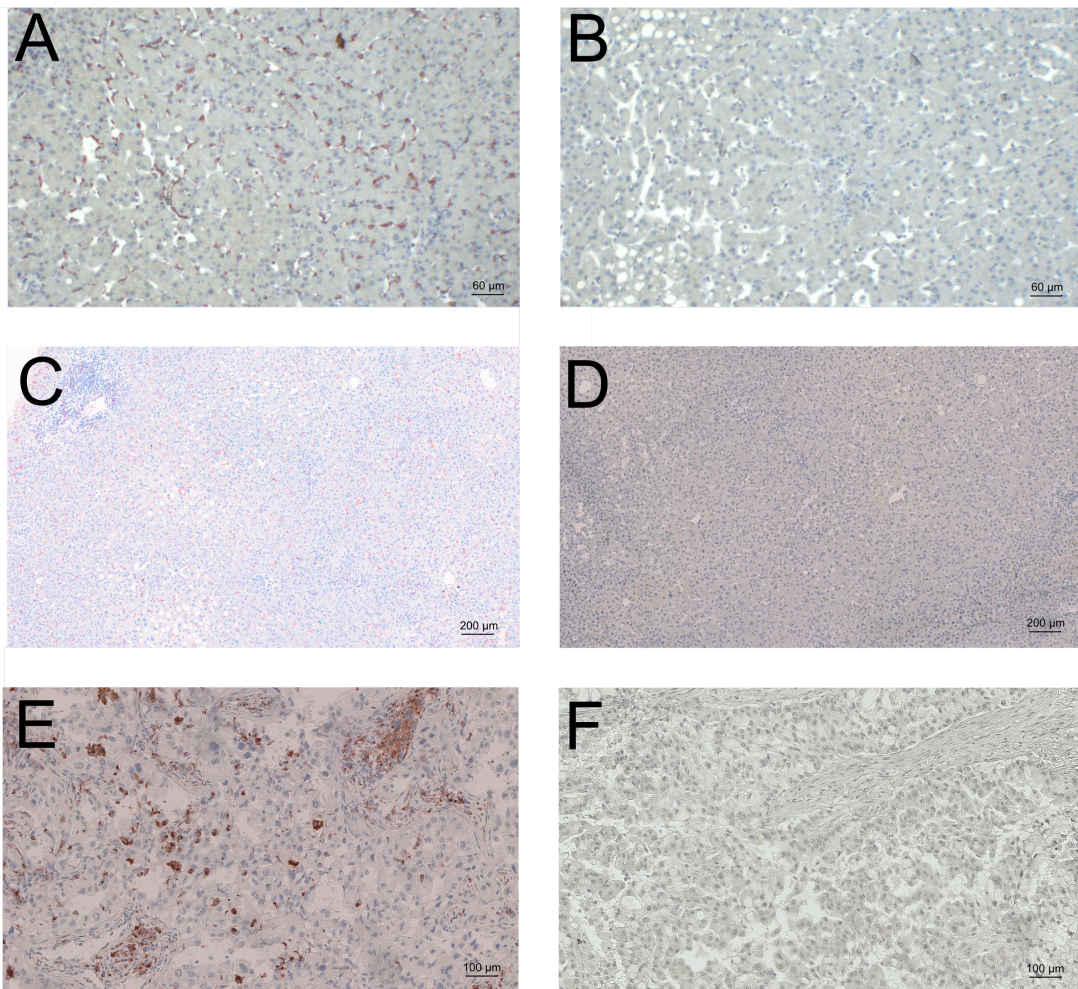

**Supplemental Figure 3: Immunohistochemistry positive and negative controls. (A)** Immunohistochemistry of splenic tissue. **(B)** Negative control of splenic tissue (without primary antibody) **(C)** Immunohistochemistry of hepatic tissue. **(D)** Negative control of hepatic tissue (without primary antibody) **(E)** Immunohistochemistry of lung tissue. **(F)** Negative control of lung tissue (without primary antibody).
